## Index to Volume XXVIII

| Articles                                                                                                                                                                                            | Page |
|-----------------------------------------------------------------------------------------------------------------------------------------------------------------------------------------------------|------|
| <b>Ansell, A. D., and F. A. Loosmore.</b> Preliminary observations on the relationship between growth, spawning and condition in experimental colonies of <i>Venus mercenaria</i> (Linn.) . . . . . | 285  |
| <b>Bainbridge, V.</b> The food, feeding habits and distribution of the bonga <i>Ethmalosa dorsalis</i> (Cuvier & Valenciennes) . . . . .                                                            | 270  |
| <b>Blaxter, J. H. S., and G. Hempel.</b> The influence of egg size on herring larvae ( <i>Clupea harengus</i> L.) . . . . .                                                                         | 211  |
| <b>Bougis, Paul.</b> Comparaison des méthodes au diéthylthiocarbamate de sodium (SDDC) et à la 2-2'-diquinolyte pour le dosage de cuivre en eau de mer . . . . .                                    | 171  |
| <b>Braconnot, J. C.</b> Etude du cycle annuel des salpes et doliolés en rade de Villefrance-sur-Mer . . . . .                                                                                       | 21   |
| <b>Burd, A. C.</b> On selection by the drifter fleets in the East Anglian herring fishery . . . . .                                                                                                 | 91   |
| <b>Dow, Robert.</b> A comparison among selected marine species of an association between sea water temperature and relative abundance . . . . .                                                     | 425  |
| <b>El-Zarka, Salah El-Din.</b> Acclimatization of <i>Solea vulgaris</i> (Linn.) in Lake Quarun, Egypt . . . . .                                                                                     | 126  |
| <b>Fahy, William E.</b> A temperature-controlled salt-water circulating apparatus for developing fish eggs and larvae . . . . .                                                                     | 364  |
| <b>Gambell, R., and J. Messtorff.</b> Age determination in the whiting ( <i>Merlangius merlangus</i> L.) by means of the otoliths . . . . .                                                         | 393  |
| <b>Holden, M. J., and P. S. Meadows.</b> The fecundity of the spurdog ( <i>Squalus acanthias</i> L.) . . . . .                                                                                      | 418  |
| <b>Jones, P. G. W.</b> The effect of chloroform on the soluble inorganic phosphate content of unfiltered sea water . . . . .                                                                        | 3    |
| <b>Jones, P. G. W., and S. M. Haq.</b> The distribution of <i>Phaeocystis</i> in the eastern Irish Sea . . . . .                                                                                    | 8    |
| <b>Kabata, Z.</b> Incidence of coccidiosis in Scottish herring . . . . .                                                                                                                            | 201  |
| <b>Lindroth, Arne.</b> The body/scale relationship in Atlantic salmon ( <i>Salmo salar</i> L.). A preliminary report . . . . .                                                                      | 137  |
| <b>Marr, James.</b> Some notes on the preservation of marine animals . . . . .                                                                                                                      | 121  |
| <b>Millar, R. H.</b> Breeding and gonadal cycle of oysters in Loch Ryan, Scotland . . . . .                                                                                                         | 432  |
| <b>Miller, David, John B. Colton, Jr., and Robert R. Marak.</b> A study of the vertical distribution of larval haddock . . . . .                                                                    | 37   |

|                                                                                                                                                                                               |     |
|-----------------------------------------------------------------------------------------------------------------------------------------------------------------------------------------------|-----|
| <b>Mitson, R. B.</b> Marine Fish Culture in Britain. V. An electronic device for counting the nauplii of <i>Artemia salina</i> L. . . . .                                                     | 262 |
| <b>Moyse, John.</b> A comparison of the value of various flagellates and diatoms as food for barnacle larvae . . . . .                                                                        | 175 |
| <b>Pantulu, Rayappa V.</b> Studies on the age and growth, fecundity and spawning of <i>Osteogeneiosus militaris</i> (Linn.) . . . . .                                                         | 295 |
| <b>Patten, Bernard C.</b> The rational decision process in salmon migration. . . . .                                                                                                          | 410 |
| <b>Patten, Bernard C., John J. Norcross, David K. Young, and Charles L. Rutherford.</b> Some experimental characteristics of dark and light bottles . . . . .                                 | 335 |
| <b>Raymont, J. E. G., J. Austin and Eileen Linford.</b> Biochemical studies on marine zooplankton. I. The biochemical composition of <i>Neomysis integer</i> . . . . .                        | 354 |
| <b>Reeve, M. R.</b> A simple torsion microbalance for weighing small animals . . . . .                                                                                                        | 385 |
| <b>Rice, A. L.</b> The food of the Irish Sea herring in 1961 and 1962 . . . . .                                                                                                               | 188 |
| <b>Riley, J. D., and G. T. Thacker.</b> Marine Fish Culture in Britain. III. Plaice ( <i>Pleuronectes platessa</i> (L.)) rearing in closed circulation at Lowestoft, 1961 . . . . .           | 80  |
| <b>Saila, Saul B., and Raymond A. Shappy.</b> Random movement and orientation in salmon migration . . . . .                                                                                   | 153 |
| <b>Shelbourne, J. E.</b> Marine Fish Culture in Britain. II. A plaice rearing experiment at Port Erin, Isle of Man, during 1960, in open sea water circulation. . . . .                       | 70  |
| <b>Shelbourne, J. E.</b> Marine Fish Culture in Britain. IV. High survivals of metamorphosed plaice during salinity experiments in open circulation at Port Erin, Isle of Man, 1961 . . . . . | 246 |
| <b>Shelbourne, J. E., I. D. Riley, and G. T. Thacker.</b> Marine Fish Culture in Britain. I. Plaice rearing in closed circulation at Lowestoft, 1957-1960 . . . . .                           | 50  |
| <b>Sorokin, V. P.</b> On the influence of the fishery upon the population structure of redfish ( <i>Sebastes marinus</i> L. and <i>Sebastes mentella</i> Travin) . . . . .                    | 405 |
| <b>Spencer, C. P.</b> The estimation of phytoplankton pigments . . . . .                                                                                                                      | 327 |
| <b>Zijlstra, J. J., and J. F. de Veen.</b> On the relative fishing power of Dutch trawlers . . . . .                                                                                          | 246 |

#### Review

|                                                              |     |
|--------------------------------------------------------------|-----|
| <b>Hines, Neal O.</b> Proving Ground. (A. PRESTON) . . . . . | 321 |
|--------------------------------------------------------------|-----|

#### Notices and Correspondence

|                                                                              |     |
|------------------------------------------------------------------------------|-----|
| <b>Obituary Notice: -</b>                                                    |     |
| <b>Pierre Desbrosses</b> (1902-1962), by J. FURNESTIN . . . . .              | 325 |
| <b>Notice: -</b>                                                             |     |
| ICES Oceanographic Data Lists, by JENS SMED . . . . .                        | 167 |
| <b>Letters to the Editor: -</b>                                              |     |
| Salmon Migration (S. B. SAILA and R. A. SHAPPY; BERNARD C. PATTEN) . . . . . | 440 |
